# Supplementary material for: How a 7-Week Food Literacy Cooking Program Affects Cooking Confidence and Mental Health: Findings of a Quasi-Experimental Controlled Intervention Trial
Source: PubMed Central journal article supplement (PMC8970183; doi:10.3389/fnut.2022.802940), 2022-03-17
Supplement: Data_Sheet_1.pdf [file Data_Sheet_1.pdf]

## *Supplementary Material*

### Supplementary material - Additional File 1. Part a. Study timetable of program dates and course locations throughout study period

| Site | Site Type (visit number) | Course Dates      | Course Release Date | Control Date | Intervention Date |
|------|--------------------------|-------------------|---------------------|--------------|-------------------|
| 1    | Metro site A (1)         | 12/09/16-29/10/16 | 04/07/2016          | 08/08/2016   | 12/09/2016        |
| 2    | Metro site B (1)         | 03/11/16-21/12/16 | 25/08/2016          | 29/09/2016   | 03/11/2016        |
| 3    | Regional site A (1)      | 16/1/17-18/02/17  | 12/12/2016          | N/A*         | 16/01/2017        |
| 4    | Metro site A (2)         | 22/02/17-11/04/17 | 26/12/2016          | 18/01/2017   | 22/02/2017        |
| 5    | Metro site A (3)         | 19/04/17-06/06/17 | 22/02/2017          | 15/03/2017   | 19/04/2017        |
| 6    | Metro site C (1)         | 12/06/17-29/07/17 | 10/04/2017          | 08/05/2017   | 12/06/2017        |
| 7    | Regional site B (1)      | 07/08/17-23/09/17 | 12/06/2017          | 03/07/2017   | 07/08/2017        |
| 8    | Metro site D (1)         | 27/09/17-14/11/17 | 02/08/2017          | 23/08/2017   | 27/09/2017        |
| 9    | Metro site E (1)         | 20/11/17-23/12/17 | 25/09/2017          | 16/10/2017   | 20/11/2017        |
| 10   | Regional site A (2)      | 08/01/18-25/2/18  | 13/11/2017          | 04/12/2017   | 08/01/2018        |
| 11   | Metro site A (4)         | 02/03/18-24/04/18 | 05/01/2018          | 26/01/2018   | 02/03/2018        |
| 12   | Metro site A (5)         | 26/04/18-13/6/18  | 01/03/2018          | 22/03/2018   | 26/04/2018        |
| 13   | Metro site F (1)         | 18/06/18-21/07/18 | 16/04/2018          | 14/05/2018   | 18/06/2018        |
| 14   | Regional site C (1)      | 30/7/18-31/08/18  | 04/06/2018          | 25/06/2018   | 30/07/2018        |
| 15   | Regional site B (2)      | 05/09/18-23/10/18 | 11/07/2018          | 01/08/2018   | 05/09/2018        |
| 16   | Metro site A (6)         | 01/11/18-18/12/18 | 30/08/2018          | 27/09/2018   | 01/11/2018        |

\*No Control due to Christmas

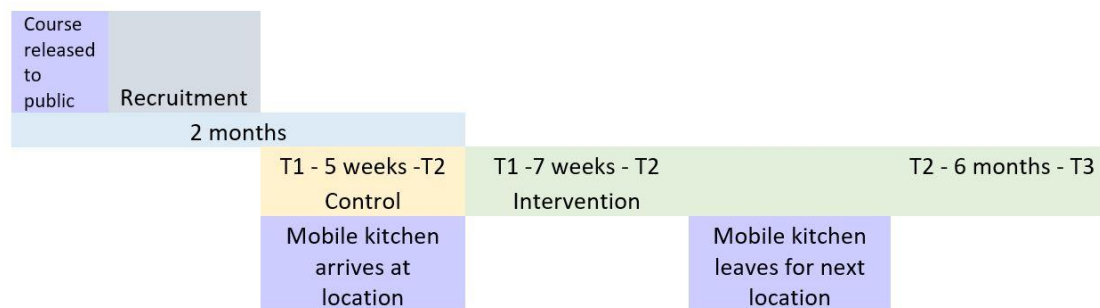

### Part b. Timeline for each location

**Supplementary material – Additional File 2.** LAB survey questions surrounding secondary outcome measures

**HEALTHY COOKING:**

[Never; Less than once; Once; 2-3 times; 4-6 times; Daily]

- In a typical week, how often do you prepare and cook a main meal from basic ingredients?
- In a typical week, how often do you eat ready-made meals at home?
- In a typical week, how often do you include salad or vegetables with the main meal?

**HEALTHY EATING:**

[Never; Less than once; Once; 2-3 times; 4-6 times; Daily]

- How often do you include salad or vegetables with the main meal? For example, chicken with vegetables or pasta with salad.
- How many serves of vegetables including fresh, dried, frozen and tinned vegetables do you usually eat each day, where a serve is half a cup of cooked vegetables or 1 cup of salad?
- How many serves of fruit including fresh, dried, frozen and tinned vegetables do you usually eat each day, where a serve is a medium piece or two small pieces of fruit, or a cup of diced pieces?
- How many times do you eat take-away or 'fast-foods' from places such as McDonalds, Red-Rooster, fish and chip shop, Asian take-away or local take-away pizza places?

**AFFORDABILITY OF A HEALTHY MEAL**

- In a typical week, how much does your household spend in total on food and drink?
- In a typical week, how much does your household spend in total on fruit and vegetables?
- In a typical week, how much does your household spend in total on take away/fast foods?

**SOCIAL CONNECTEDNESS AROUND COOKING AND EATING**

[Never; Less than once; Once; 2-3 times; 4-6 times; Daily]

- In a typical week, how often do you eat together at home, with the other people in your household in the evenings?
- In a typical week, how often do you eat your dinner in front of the TV?
- In a typical week, how often do you eat your dinner sitting at a dinner table or equivalent?

**ATTITUDES AND BELIEFS**

- Please choose the answer which best indicates how much you agree or disagree with each of the following statements. [Strongly disagree; somewhat disagree; somewhat agree; strongly agree]
- I find it easy to change my eating habits
- My lifestyle prevents me eating a healthy diet
- Vegetables can be tasty foods
- I eat enough fruit and vegetables
- I can put together a healthy meal from scratch in 30 minutes

- I enjoy cooking
- I enjoy cooking for others
- I get a lot of satisfaction from cooking my meals
- I enjoy eating a meal with others
- I can prepare a meal from basic ingredients that is low in price
- Fruit and vegetables are cheaper when they are in season
- Buying more fruit and vegetables would be difficult on my budget

#### NUTRITION KNOWLEDGE

- Which of the following choices do you think is not high in salt and could be used to enhance the flavours in food?

[Bacon, Cheese, Tomato sauce, Herbs and spices, Once a week, Not sure]

- Out of the items listed below, which foods do you think health experts recommend eating the least?

[Olive oil, Butter, Avocados, Nuts and seeds, Vegetable oil, Not sure]

- If a person felt like something sweet, but was trying to cut down on sugar, which would be the best choice?

[Glass of fruit juice, A piece of fruit, A plain biscuit, A cereal snack bar, Not sure]

**Supplementary material – Additional File 3.** Comparison of demographic characteristics by group at T1 and comparison of means at T2.

|                                                              | <b>T1 Control<br/>n (%)</b> | <b>T1<br/>Intervention<br/>n (%)</b> | <b>T1<br/><math>\chi^2</math> Test<br/>p value<sup>1</sup></b> | <b>T2<br/><math>\chi^2</math> Test<br/>p value<sup>1</sup></b> |
|--------------------------------------------------------------|-----------------------------|--------------------------------------|----------------------------------------------------------------|----------------------------------------------------------------|
| Male                                                         | 39 (23.8)                   | 111 (22.5)                           | 0.738                                                          | 0.378                                                          |
| Female                                                       | 125 (76.2)                  | 382 (77.5)                           |                                                                |                                                                |
| #Age                                                         | 44.4 ±14.9                  | 43.9 ±14.7                           | 0.698                                                          | 0.886                                                          |
| #BMI kg/m <sup>2</sup>                                       | 27.1 ± 6.2                  | 27.5 ± 6.1                           |                                                                | 0.103                                                          |
| Speaks English as the main language at home                  | 143 (87.2)                  | 453 (91.9)                           | 0.073                                                          | 0.157                                                          |
| Completed education beyond Year 12 high school               | 110 (67.0)                  | 314 (63.7)                           | 0.556                                                          | 0.552                                                          |
| Occupation                                                   |                             |                                      |                                                                |                                                                |
| Working full-time                                            | 51 (31.1)                   | 148 (30)                             |                                                                |                                                                |
| Working part-time                                            | 44 (26.8)                   | 139 (28.2)                           |                                                                |                                                                |
| Full-time student                                            | 20 (12.2)                   | 35 (7.1)                             |                                                                |                                                                |
| Part-Time student                                            | 5 (3.0)                     | 13 (2.6)                             |                                                                |                                                                |
| Home duties/carer                                            | 12 (7.3)                    | 49 (9.9)                             |                                                                |                                                                |
| Not working (unemployed, retired, unable to work and others) | 32 (19.5)                   | 109 (22.1)                           |                                                                |                                                                |
| Household yearly income >\$50,000                            | 96 (67.1)                   | 290 (68.1)                           | 0.684                                                          | 0.218                                                          |
| Access to a kitchen to prepare own meals                     | 163 (99.4)                  | 492 (99.8)                           | 0.413                                                          | 0.576                                                          |
| Attending participant does household food shopping           | 138 (82.9)                  | 418 (84.8)                           | 0.570                                                          | 0.694                                                          |

<sup>1</sup> Significance defined as \* $p < 0.05$  and \*\* $p < 0.01$ , #Mean ±SD

**Supplementary material – Additional File 4.** Program interaction effects over time for outcome measures from T2 to T3 (6 months post-program) in intervention group

| <b>Cooking confidence</b>                                                                                                                                                                      | <b>Change (T3-T2)<br/>mean (SE<sup>2</sup>)</b> | <b>Post Hoc<br/>p value<sup>3</sup></b> |
|------------------------------------------------------------------------------------------------------------------------------------------------------------------------------------------------|-------------------------------------------------|-----------------------------------------|
| Confidence about being able to cook from basic ingredients                                                                                                                                     | 0.006 (0.08)                                    | 0.94                                    |
| Confidence about following a simple recipe                                                                                                                                                     | 0.146 (0.09)                                    | 0.10                                    |
| Confidence about preparing and cooking new foods and recipes                                                                                                                                   | 0.010 (0.10)                                    | 0.92                                    |
| Confidence that what is cooked will “turn out” well                                                                                                                                            | 0.069 (0.11)                                    | 0.54                                    |
| Confidence about tasting foods not eaten before                                                                                                                                                | 0.047 (0.12)                                    | 0.69                                    |
| <b>Healthy cooking</b>                                                                                                                                                                         |                                                 |                                         |
| In a typical week, how often do you prepare and cook a <u>main meal</u> from basic ingredients?                                                                                                | 0.005 (0.11)                                    | 0.96                                    |
| In a typical week, how often do you eat <u>ready-made meals</u> at home?                                                                                                                       | 0.125 (0.16)                                    | 0.42                                    |
| In a typical week, how often do you include salad or vegetables with the main meal?                                                                                                            | 0.21 (0.13)                                     | 0.10                                    |
| <b>Healthy eating</b>                                                                                                                                                                          |                                                 |                                         |
| How many serves of vegetables, including fresh, dried, frozen and tinned vegetables do you usually eat each day, where a serve is half a cup of cooked vegetables or 1 cup of salad?           | 0.08 (0.18)                                     | 0.67                                    |
| How many serves of fruit, including fresh, dried, frozen and tinned fruit do you usually eat each day, where a serve is a medium piece or two small pieces of fruit, or a cup of diced pieces? | -0.10 (0.16)                                    | 0.534                                   |
| How many times do you eat take-away or ‘fast foods’?                                                                                                                                           | -0.047 (0.09)                                   | 0.597                                   |
| <b>Affordability of a healthy meal</b>                                                                                                                                                         |                                                 |                                         |
| In a typical week, how much does your household spend in total on food and drink?                                                                                                              | -0.19 (0.13)                                    | 0.15                                    |
| In a typical week, how much does your household spend in total on fruit and vegetables?                                                                                                        | -0.12 (0.65)                                    | 0.46                                    |
| In a typical week, how much does your household spend in total on take away/fast foods?                                                                                                        | 0.033 (0.24)                                    | 0.89                                    |
| <b>Social connectedness around cooking and eating<sup>4</sup></b>                                                                                                                              |                                                 |                                         |
| In a typical week, how often do you eat together at home, with the other people in your household in the evenings?                                                                             | 0.58 (0.33)                                     | 0.09                                    |
| In a typical week, how often do you eat your dinner in front of the TV?                                                                                                                        | -0.002 (0.15)                                   | 0.99                                    |

|                                                                                              |               |       |
|----------------------------------------------------------------------------------------------|---------------|-------|
| In a typical week, how often do you eat your dinner sitting at a dinner table or equivalent? | 0.11 (0.18)   | 0.56  |
| <b>Attitudes and beliefs regarding healthy eating<sup>5</sup></b>                            |               |       |
| I find it easy to change my eating habits                                                    | -0.03 (0.11)  | 0.794 |
| My lifestyle prevents me eating a healthy diet <sup>^</sup>                                  | 0.02 (0.11)   | 0.85  |
| Vegetables can be tasty foods                                                                | 0.03 (0.07)   | 0.71  |
| I eat enough fruit and vegetables                                                            | 0.08 (0.10)   | 0.43  |
| Fruit and vegetables are cheaper when they are in season                                     | 0.006 (0.09)  | 0.95  |
| <b>Cooking ability, enjoyment and satisfaction<sup>5</sup></b>                               |               |       |
| I can put together a healthy meal from scratch in 30 minutes                                 | 0.06 (0.09)   | 0.56  |
| I enjoy cooking                                                                              | -0.034 (0.08) | 0.688 |
| I enjoy cooking for others                                                                   | -0.09 (0.08)  | 0.252 |
| I get a lot of satisfaction from cooking my meals                                            | -0.13 (0.10)  | 0.214 |
| I enjoy eating a meal with others                                                            | 0.03 (0.08)   | 0.723 |
| <b>Attitudes &amp; beliefs of affordability of a healthy meal<sup>5</sup></b>                |               |       |
| I can prepare a meal from basic ingredients that is low in price                             | -0.05 (0.08)  | 0.498 |
| Buying more fruit and vegetables would be difficult on my budget <sup>^</sup>                | -0.10 (0.13)  | 0.440 |
| <b>General health and self-esteem</b>                                                        |               |       |
| In general how do you feel about your health? <sup>6</sup>                                   | -0.13 (0.11)  | 0.228 |
| Global self-esteem                                                                           | -0.33 (0.53)  | 0.531 |
| PCS12                                                                                        | -0.08 (0.95)  | 0.933 |
| MCS12                                                                                        | -2.37 (1.19)  | 0.051 |
| SVS_Total                                                                                    | -1.00 (0.74)  | 0.18  |
| WEMWBS                                                                                       | -0.80 (0.87)  | 0.360 |

<sup>1</sup>Values reported are adjusted for the effects of age, gender, BMI, income and education

<sup>2</sup>SE = Standard Error of Measurement

<sup>3</sup>\* $p < 0.05$  and \*\*  $p < 0.01$

<sup>4</sup>Categorical response item/s where "Never" = 1 "Less than once a month" = 2 "Once a week" = 3 "2 times a week" = 4 "3-4 times a week" = 5 "5 or more times a week" = 6 "Don't know" = Missing = 7

<sup>5</sup>Likert scale response item/s where "Strongly disagree" = 1 "Somewhat disagree" = 2 "Somewhat agree" = 3 "Strongly agree" = 4

<sup>6</sup>Categorical response items where 1 = 'Excellent'; 2 = 'Very good'; 3 = 'Good'; 4 = 'Fair'; 5 = 'Poor'.

<sup>^</sup>Item response recoded where "Strongly disagree" = 4 "Somewhat disagree" = 3 "Somewhat agree" = 2 "Strongly agree" = 1

**Supplementary material – Additional File 5.** Multivariable-adjusted general linear models of program interaction effects over time for secondary outcome measures at T1 (baseline), T2 (5/7-week follow-up) and T3 (6-month follow-up – intervention only) by group<sup>1</sup>.

| Secondary Outcome Measure                                                                                                                                                                      | Interaction effect   |                                                   | Control Group<br>mean (SE <sup>2</sup> ) |                   |                |                  | Intervention Group<br>mean (SE) |                   |                |                  |                   |                 |                  |
|------------------------------------------------------------------------------------------------------------------------------------------------------------------------------------------------|----------------------|---------------------------------------------------|------------------------------------------|-------------------|----------------|------------------|---------------------------------|-------------------|----------------|------------------|-------------------|-----------------|------------------|
|                                                                                                                                                                                                | p value <sup>5</sup> | Effect size <sup>6</sup><br>(partial eta squared) | Baseline (T1)                            | Post Program (T2) | Change (T2-T1) | Post Hoc p value | Baseline (T1)                   | Post Program (T2) | Change (T2-T1) | Post Hoc p value | Post Program (T3) | Change (T3-T2)  | Post Hoc p value |
| <b>Healthy cooking</b>                                                                                                                                                                         |                      |                                                   |                                          |                   |                |                  |                                 |                   |                |                  |                   |                 |                  |
| In a typical week, how often do you eat <u>ready-made meals</u> at home?                                                                                                                       | 0.628                | N/S <sup>3</sup>                                  | 2.57<br>(0.171)                          | 2.32<br>(0.17)    | 0.25<br>(0.12) | NA <sup>4</sup>  | 2.45 (0.10)                     | 2.26 (0.10)       | -0.18 (0.08)   | NA               | 2.06<br>(0.19)    | 0.125<br>(0.16) | 0.42             |
| In a typical week, how often do you include salad or vegetables with the main meal?                                                                                                            | 0.127                | N/S                                               | 4.95<br>(0.14)                           | 5.16<br>(0.11)    | 0.21<br>(0.12) | NA <sup>4</sup>  | 4.85 (0.08)                     | 5.24 (0.07)       | 0.40 (0.07)    | NA               | 4.93<br>(0.11)    | 0.21<br>(0.13)  | 0.10             |
| <b>Healthy eating</b>                                                                                                                                                                          |                      |                                                   |                                          |                   |                |                  |                                 |                   |                |                  |                   |                 |                  |
| How many serves of vegetables, including fresh, dried, frozen and tinned vegetables do you usually eat each day, where a serve is half a cup of cooked vegetables or 1 cup of salad?           | 0.624                | N/S                                               | 4.15<br>(0.20)                           | 4.68<br>(0.20)    | 0.53<br>(0.17) | NA               | 4.36 (0.12)                     | 4.98 (0.12)       | 0.62 (0.11)    | NA               | 4.89<br>(0.21)    | 0.08<br>(0.18)  | 0.67             |
| How many serves of fruit, including fresh, dried, frozen and tinned fruit do you usually eat each day, where a serve is a medium piece or two small pieces of fruit, or a cup of diced pieces? | 0.890                | N/S                                               | 3.54<br>(0.18)                           | 3.84<br>(0.18)    | 0.30<br>(0.15) | NA               | 3.49 (0.11)                     | 3.81 (0.11)       | 0.32 (0.09)    | NA               | 3.69<br>(0.18)    | -0.10<br>(0.16) | 0.534            |

| Secondary Outcome Measure                                                                                         | Interaction effect          |                                                   | Control Group<br>mean (SE <sup>2</sup> ) |                   |                  |                         | Intervention Group<br>mean (SE) |                   |                |                         |                   |                  |                         |
|-------------------------------------------------------------------------------------------------------------------|-----------------------------|---------------------------------------------------|------------------------------------------|-------------------|------------------|-------------------------|---------------------------------|-------------------|----------------|-------------------------|-------------------|------------------|-------------------------|
|                                                                                                                   | <i>p</i> value <sup>5</sup> | Effect size <sup>6</sup><br>(partial eta squared) | Baseline (T1)                            | Post Program (T2) | Change (T2-T1)   | Post Hoc <i>p</i> value | Baseline (T1)                   | Post Program (T2) | Change (T2-T1) | Post Hoc <i>p</i> value | Post Program (T3) | Change (T3-T2)   | Post Hoc <i>p</i> value |
| How many times do you eat take-away or 'fast foods'?                                                              | 0.540                       | N/S                                               | 2.85<br>(0.13)                           | 2.72<br>(0.11)    | -0.12<br>(0.11)  | NA                      | 2.67 (0.08)                     | 2.47 (0.07)       | -0.20 (0.07)   | NA                      | 2.50<br>(0.09)    | -0.047<br>(0.09) | 0.597                   |
| <b>Affordability of a healthy meal</b>                                                                            |                             |                                                   |                                          |                   |                  |                         |                                 |                   |                |                         |                   |                  |                         |
| In a typical week, how much does your household spend in total on food and drink                                  | 0.489                       | N/S                                               | 5.75<br>(0.15)                           | 5.61<br>(0.15)    | -0.14<br>(0.12)  | NA                      | 5.62 (0.09)                     | 5.56 (0.10)       | -0.05 (0.07)   | NA                      | 5.56<br>(0.15)    | -0.19<br>(0.13)  | 0.15                    |
| In a typical week, how much does your household spend in total on fruit and vegetables                            | 0.814                       | N/S                                               | 4.63<br>(0.16)                           | 4.79<br>(0.16)    | 0.16<br>(0.12)   | NA                      | 4.67 (0.10)                     | 4.80 (0.10)       | 0.13 (0.07)    | NA                      | 4.77<br>(0.16)    | -0.12<br>(0.65)  | 0.46                    |
| In a typical week, how much does your household spend in total on take away/fast foods                            | 0.208                       | N/S                                               | 3.69<br>(0.22)                           | 3.65<br>(0.21)    | -0.05<br>(0.19)  | NA                      | 3.64 (0.14)                     | 3.33 (0.13)       | -0.31 (0.12)   | NA                      | 3.44<br>(0.22)    | 0.033<br>(0.24)  | 0.89                    |
| <b>Social connectedness around cooking and eating<sup>7</sup></b>                                                 |                             |                                                   |                                          |                   |                  |                         |                                 |                   |                |                         |                   |                  |                         |
| In a typical week, how often do you eat together at home, with the other people in your household in the evenings | 0.108                       | N/S                                               | 4.53<br>(0.26)                           | 4.50<br>(0.24)    | -0.035<br>(0.16) | NA                      | 4.74 (0.16)                     | 4.97 (0.15)       | 0.24 (0.10)    | NA                      | 4.89<br>(0.24)    | 0.58<br>(0.33)   | 0.09                    |
| In a typical week, how often do you eat your dinner in front of the TV                                            | 0.784                       | N/S                                               | 4.29<br>(0.27)                           | 4.07<br>(0.28)    | -0.21<br>(0.15)  | NA                      | 4.04 (0.17)                     | 3.78 (0.17)       | -0.26 (0.09)   | NA                      | 3.82<br>(0.31)    | -0.002<br>(0.15) | 0.99                    |



| Secondary Outcome Measure                                                                   | Interaction effect   |                                                | Control Group mean (SE <sup>2</sup> ) |                   |                |                  | Intervention Group mean (SE) |                   |                |                  |                   |                |                  |
|---------------------------------------------------------------------------------------------|----------------------|------------------------------------------------|---------------------------------------|-------------------|----------------|------------------|------------------------------|-------------------|----------------|------------------|-------------------|----------------|------------------|
|                                                                                             | p value <sup>5</sup> | Effect size <sup>6</sup> (partial eta squared) | Baseline (T1)                         | Post Program (T2) | Change (T2-T1) | Post Hoc p value | Baseline (T1)                | Post Program (T2) | Change (T2-T1) | Post Hoc p value | Post Program (T3) | Change (T3-T2) | Post Hoc p value |
| In a typical week, how often do you eat your dinner sitting at a dinner table or equivalent | 0.192                | N/S                                            | 4.22 (0.27)                           | 4.32 (0.25)       | 0.10 (0.14)    | NA               | 4.20 (0.16)                  | 4.50 (0.15)       | 0.30 (0.09)    | NA               | 4.28 (0.27)       | 0.11 (0.18)    | 0.56             |
| <b>Attitudes and beliefs regarding healthy eating<sup>8</sup></b>                           |                      |                                                |                                       |                   |                |                  |                              |                   |                |                  |                   |                |                  |
| Vegetables can be tasty foods                                                               | 0.094                | N/S                                            | 3.63 (0.10)                           | 3.69 (0.08)       | 0.06 (0.08)    | NA               | 3.57 (0.06)                  | 3.79 (0.05)       | 0.21 (0.05)    | NA               | 3.73 (0.09)       | 0.03 (0.07)    | 0.71             |
| I eat enough fruit and vegetables                                                           | 0.081                | N/S                                            | 2.76 (0.13)                           | 2.87 (0.11)       | 0.11 (0.10)    | NA               | 2.61 (0.08)                  | 2.91 (0.07)       | 0.30 (0.06)    | NA               | 2.78 (0.12)       | 0.08 (0.10)    | 0.43             |
| Fruit and vegetables are cheaper when they are in season                                    | 0.644                | N/S                                            | 3.43 (0.09)                           | 3.60 (0.08)       | 0.17 (0.08)    | NA               | 3.49 (0.06)                  | 3.70 (0.05)       | 0.21 (0.05)    | NA               | 3.66 (0.08)       | 0.006 (0.09)   | 0.95             |
| <b>Cooking ability<sup>8</sup>, enjoyment and satisfaction</b>                              |                      |                                                |                                       |                   |                |                  |                              |                   |                |                  |                   |                |                  |
| I enjoy eating a meal with others                                                           | 0.217                | N/S                                            | 3.54 (0.09)                           | 3.54 (0.08)       | 0.004 (0.09)   | NA               | 3.46 (0.05)                  | 3.58 (0.05)       | 0.12 (0.05)    | NA               | 3.55 (0.09)       | 0.03 (0.08)    | 0.723            |
| <b>Attitudes &amp; beliefs of affordability of a healthy meal<sup>8</sup></b>               |                      |                                                |                                       |                   |                |                  |                              |                   |                |                  |                   |                |                  |
| I can prepare a meal from basic ingredients that is low in price                            | 0.161                | N/S                                            | 2.72 (0.12)                           | 3.05 (0.09)       | 0.328 (0.10)   | NA               | 2.92 (0.07)                  | 3.40 (0.06)       | 0.484 (0.06)   | NA               | 3.39 (0.09)       | -0.05 (0.08)   | 0.498            |
| Buying more fruit and vegetables would be difficult on my budget <sup>^</sup>               | 0.588                | N/S                                            | 3.05 (0.11)                           | 3.16 (0.10)       | 0.11 (0.11)    | NA               | 3.18 (0.07)                  | 3.36 (0.06)       | 0.067 (0.01)   | NA               | 3.35 (0.11)       | -0.10 (0.13)   | 0.440            |

<sup>1</sup>Values reported are adjusted for the effects of age, gender, BMI, income and education; <sup>2</sup>SE = Standard Error of Measurement; <sup>3</sup>N/S = No significant overall interaction effect; <sup>4</sup>Not Applicable as the overall interaction effect is not significant; <sup>5</sup>\*p<0.05 and \*\* p<0.01; <sup>6</sup>Partial eta squared effect size ranges: small effect = 0.00-0.01; medium effect = 0.01-0.06; large effect = 0.06 – 0.14; <sup>7</sup>Categorical response items where “Never” = 1 “Less than once a month” = 2 “Once a week” = 3 “2 times a week” = 4 “3-4 times a week” = 5 “5 or more times a week” = 6 “Don’t know” = Missing = 7; <sup>8</sup>Likert scale response items where “Strongly disagree” = 1 “Somewhat disagree” = 2 “Somewhat agree” = 3 “Strongly agree” = 4; <sup>^</sup> Item response recoded where “Strongly disagree” = 4 “Somewhat disagree” = 3 “Somewhat agree” = 2 “Strongly agree” = 1
